# Supplementary material for: What is the effectiveness of printed educational materials on primary care physician knowledge, behaviour, and patient outcomes: a systematic review and meta-analyses
Source: Springer Nature journal article supplement (doi:10.1186/s13012-015-0347-5), 2015-12-01
Supplement: MOESM1 [file 9773224]

## Additional file 1: Medline Search

Database: Ovid MEDLINE(R), Ovid MEDLINE(R) In-Process & Other Non-Indexed Citations, Ovid MEDLINE(R) Daily and Ovid OLDMEDLINE(R) <1946 to Present>  
Search Strategy:

- 
- 1 Physicians, Family/ [ Primary Care ] (14041)
  - 2 Family Practice/ (57860)
  - 3 (general adj practice\$).mp. (33082)
  - 4 (family adj practice\$).mp. (60308)
  - 5 (family adj medicine).mp. (5825)
  - 6 (community adj practice\$).mp. (1071)
  - 7 (group adj practice\$).mp. (10040)
  - 8 (institution\$ adj practice\$).mp. (1575)
  - 9 (physician\$ adj practice\$).mp. (35997)
  - 10 (private adj practice\$).mp. (11602)
  - 11 (solo adj practice\$).mp. (404)
  - 12 General Practitioners/ (677)
  - 13 Hospitalists/ (1125)
  - 14 Occupational Health Physicians/ (35)
  - 15 Osteopathic Physicians/ (93)
  - 16 Physicians, Primary Care/ (427)
  - 17 (community adj (doctor? or physician? or practitioner?)).mp. (897)
  - 18 (family adj (doctor? or physician? or practitioner?)).mp. (14713)
  - 19 (general adj (doctor? or physician? or practitioner?)).mp. (33986)
  - 20 Group Practice/ (6975)
  - 21 or/1-20 (164497)
  - 22 Teaching Materials/ [ Educational Materials ] (5552)
  - 23 Audiovisual Aids/ (5908)
  - 24 Exhibits as Topic/ (1406)
  - 25 Posters as Topic/ (50)
  - 26 exp Manuals as Topic/ (3351)
  - 27 Textbooks as Topic/ (1699)
  - 28 Medical Illustration/ (3775)
  - 29 Periodicals as Topic/ (31101)
  - 30 Books/ (2109)
  - 31 print\$.tw. (16836)
  - 32 paper\$.tw. (455505)
  - 33 book?.tw. (15294)
  - 34 monograph?.mp. (2679)
  - 35 pamphlet?.mp. (3716)
  - 36 journal\$.tw. (64267)
  - 37 guideline\$.mp. (222632)
  - 38 publication\$.mp. (58904)
  - 39 (postcard\$ or post-card\$).mp. (2511)
  - 40 serial\$.tw. (93922)
  - 41 textbook\$.mp. (6791)

42 manual\$.tw. (57787)  
43 (hard adj cop\$).tw. (839)  
44 poster?.tw. (4983)  
45 ((static or enduring or educat\$ or teach\$ or learn\$ or instruction\$ or train\$) adj2 material?).tw.  
(5287)  
46 ((static or enduring or educat\$ or teach\$ or learn\$ or instruction\$ or train\$) adj2 document?).tw.  
(246)  
47 bulletin?.tw. (2152)  
48 message\$.tw. (29170)  
49 or/22-48 (1007270)  
50 (online or on-line).tw. [ Delivery Method ] (41813)  
51 ((web adj page\$) or webpage\$).tw. (1164)  
52 (web-site\$ or website\$).tw. (12291)  
53 cyber\$.tw. (2709)  
54 exp Online Systems/ (11257)  
55 exp Computer-Assisted Instruction/ (8173)  
56 exp Internet/ (39324)  
57 exp Computers/ (66499)  
58 Electronic Mail/ (1462)  
59 Telefacsimile/ (209)  
60 (handheld adj2 computer\$).tw. (343)  
61 Internet\$.tw. (21894)  
62 "personal digital assistant\$.tw. (773)  
63 (pocket adj PC\$).tw. (44)  
64 virtual.tw. (22199)  
65 (web adj based\$).tw. (9756)  
66 webbased\$.tw. (11)  
67 "world wide web\$".tw. (2583)  
68 www.tw. (1239)  
69 (e-bulletin adj board\$).tw. (0)  
70 "electronic bulletin board\$".tw. (52)  
71 (electronic adj mail\$).tw. (606)  
72 email\$.tw. (1619)  
73 e-mail\$.tw. (3768)  
74 (list adj serv\$).tw. (90)  
75 listserv\$.tw. (229)  
76 (compact adj disc).tw. (205)  
77 (compact adj disk).tw. (122)  
78 CD-ROM.tw. (1035)  
79 DVD.tw. (658)  
80 (flash adj drive?).tw. (16)  
81 (USB adj key?).tw. (2)  
82 (USB adj drive?).tw. (4)  
83 workshop?.tw. (22009)  
84 ((educat\$ or train\$ or learn\$ or teach\$) adj program?).tw. (39153)  
85 mail\$.tw. (29424)  
86 ((educat\$ or teach\$ or learn\$ or instruction\$ or train\$) and course?).tw. (35705)  
87 (fax\$ or facsimile?).tw. (1319)

- 88 disseminat\$.tw. (70358)
- 89 transmit\$.tw. (100229)
- 90 campaign\$.tw. (22830)
- 91 sent.tw. (31413)
- 92 Postal Service/ (1687)
- 93 or/50-92 (515888)
- 94 21 and 49 and 93 (5014)
- 95 Animals/ not (Animals/ and Humans/) (3557940)
- 96 94 not 95 (5013)
