# Supplementary material for: What is the effectiveness of printed educational materials on primary care physician knowledge, behaviour, and patient outcomes: a systematic review and meta-analyses
Source: Springer Nature journal article supplement (doi:10.1186/s13012-015-0347-5), 2015-12-01
Supplement: MOESM2 [file 9773224]

| Study                    | 1. Name | 2. Why | 3.a)<br>Materials<br>Described | 3.b)<br>Materials<br>Available | 4.<br>Procedures | 5. Provider | 6. Mode of<br>Delivery | 7. Location | 8. When and<br>How Much | 9. Tailoring | 10. Modifi-<br>cations | 11. Planned<br>Adherence | 12. Actual<br>Adherence |
|--------------------------|---------|--------|--------------------------------|--------------------------------|------------------|-------------|------------------------|-------------|-------------------------|--------------|------------------------|--------------------------|-------------------------|
| Kottke, T.E. (1989)      | ✓       | ✓      | ✓                              | x                              | x                | x           | x                      | ✓           | ✓                       | N/A          | N/A                    | x                        | x                       |
| Butzlaff, M. (2003)      | ✓       | ✓      | ✓                              | x                              | ✓                | ✓           | ✓                      | ✓           | ✓                       | N/A          | N/A                    | ✓                        | ✓                       |
| Simon, A.E. (2010)       | ✓       | ✓      | ✓                              | ✓                              | ✓                | x           | ✓                      | ✓           | ✓                       | N/A          | N/A                    | x                        | x                       |
| Nicholas, J. (2009)      | ✓       | ✓      | ✓                              | x                              | ✓                | ✓           | ✓                      | ✓           | ✓                       | N/A          | N/A                    | x                        | x                       |
| Dubey, V. (2006)         | ✓       | ✓      | ✓                              | ✓                              | ✓                | ✓           | ✓                      | ✓           | ✓                       | N/A          | N/A                    | x                        | ✓                       |
| Evans, C.E. (1986)       | ✓       | ✓      | ✓                              | x                              | ✓                | x           | x                      | ✓           | ✓                       | N/A          | N/A                    | x                        | x                       |
| Hunskaar, S. (1996)      | ✓       | ✓      | ✓                              | x                              | ✓                | x           | x                      | ✓           | ✓                       | N/A          | N/A                    | x                        | x                       |
| Liaw S.T. (2008)         | ✓       | ✓      | ✓                              | x                              | x                | x           | x                      | ✓           | ✓                       | N/A          | N/A                    | x                        | x                       |
| McEwan A. (2002)         | ✓       | ✓      | x                              | ✓                              | ✓                | ✓           | ✓                      | ✓           | x                       | N/A          | N/A                    | x                        | x                       |
| Mukohara, K. (2005)      | ✓       | ✓      | ✓                              | x                              | ✓                | x           | ✓                      | x           | x                       | N/A          | N/A                    | ✓                        | ✓                       |
| Perria C. (2007)         | ✓       | ✓      | ✓                              | x                              | x                | x           | x                      | ✓           | x                       | N/A          | N/A                    | x                        | x                       |
| Tziraki C. (2000)        | ✓       | ✓      | ✓                              | ✓                              | ✓                | x           | ✓                      | ✓           | x                       | N/A          | N/A                    | x                        | x                       |
| Watson M. (2001)         | ✓       | ✓      | ✓                              | ✓                              | x                | x           | x                      | ✓           | ✓                       | N/A          | N/A                    | x                        | x                       |
| Guadagnoli, E. (2004)    | ✓       | x      | ✓                              | x                              | ✓                | ✓           | ✓                      | ✓           | ✓                       | ✓            | N/A                    | x                        | x                       |
| Dickinson, W.P. (2003)   | ✓       | ✓      | ✓                              | x                              | ✓                | x           | x                      | ✓           | x                       | N/A          | N/A                    | x                        | x                       |
| Downs, M. (2006)         | ✓       | x      | ✓                              | ✓                              | x                | x           | ✓                      | ✓           | x                       | N/A          | N/A                    | x                        | x                       |
| Matowe, L. (2002)        | ✓       | ✓      | ✓                              | x                              | ✓                | ✓           | ✓                      | ✓           | ✓                       | N/A          | N/A                    | x                        | x                       |
| Rabin, D. (1994)         | ✓       | ✓      | ✓                              | x                              | ✓                | ✓           | ✓                      | ✓           | x                       | N/A          | N/A                    | x                        | ✓                       |
| Rahme, E. (2005)         | ✓       | ✓      | ✓                              | ✓                              | ✓                | x           | ✓                      | ✓           | ✓                       | N/A          | N/A                    | x                        | x                       |
| Wright, N.M.J. (2004)    | ✓       | ✓      | ✓                              | x                              | ✓                | ✓           | ✓                      | ✓           | ✓                       | N/A          | N/A                    | x                        | x                       |
| Szonyi, G. (1994)        | ✓       | x      | ✓                              | ✓                              | ✓                | x           | x                      | x           | x                       | N/A          | N/A                    | ✓                        | ✓                       |
| Avorn, J. (1983)         | ✓       | ✓      | ✓                              | x                              | ✓                | x           | ✓                      | ✓           | ✓                       | N/A          | N/A                    | x                        | x                       |
| Bearcroft, P.W.P. (1994) | ✓       | ✓      | ✓                              | x                              | ✓                | x           | x                      | ✓           | ✓                       | N/A          | N/A                    | x                        | x                       |
| Dormuth, C.R. (2004)     | ✓       | x      | ✓                              | x                              | ✓                | x           | ✓                      | ✓           | ✓                       | N/A          | N/A                    | x                        | x                       |
| Oakeshott, P. (1994)     | ✓       | ✓      | ✓                              | x                              | ✓                | x           | x                      | x           | ✓                       | N/A          | N/A                    | x                        | x                       |
| Worrall, G. (1999)       | ✓       | ✓      | x                              | x                              | ✓                | x           | ✓                      | x           | x                       | N/A          | N/A                    | x                        | x                       |
| Watson E. (2001)         | ✓       | ✓      | ✓                              | x                              | ✓                | x           | x                      | ✓           | ✓                       | N/A          | N/A                    | x                        | x                       |
| Hazard, R.G. (1997)      | ✓       | x      | ✓                              | x                              | ✓                | x           | x                      | ✓           | ✓                       | N/A          | N/A                    | x                        | ✓                       |
| Denig, P. (1990)         | ✓       | ✓      | ✓                              | x                              | ✓                | ✓           | ✓                      | ✓           | x                       | N/A          | N/A                    | x                        | x                       |
| Kunz, R. (2007)          | ✓       | ✓      | ✓                              | ✓                              | ✓                | ✓           | ✓                      | ✓           | ✓                       | ✓            | N/A                    | ✓                        | ✓                       |
| Bjornson, D.C. (1990)    | ✓       | ✓      | ✓                              | x                              | ✓                | ✓           | x                      | ✓           | ✓                       | ✓            | N/A                    | ✓                        | ✓                       |
| Tsuji, S.R. (2007)       | ✓       | x      | ✓                              | x                              | x                | x           | x                      | x           | x                       | N/A          | N/A                    | x                        | x                       |
