# Supplementary material for: What is the effectiveness of printed educational materials on primary care physician knowledge, behaviour, and patient outcomes: a systematic review and meta-analyses
Source: Springer Nature journal article supplement (doi:10.1186/s13012-015-0347-5), 2015-12-01
Supplement: MOESM3 [file 9773224]

**Additional file 3: Study-level Outcomes**

| <b>Clinical Patient Outcomes</b> |                                                                                                                           |                |                         |                                     |
|----------------------------------|---------------------------------------------------------------------------------------------------------------------------|----------------|-------------------------|-------------------------------------|
| <b>Author (Year)</b>             | <b>Outcomes Examined</b>                                                                                                  | <b>Results</b> |                         |                                     |
|                                  |                                                                                                                           | <b>Control</b> | <b>Experiment (PEM)</b> | <b>Effect Size and Significance</b> |
| Dickinson, W.P. (2003) [21]      | 1) 12 month intervention effect on physical functioning (SF-36) for multisomatofom disorder, change score (95% CI)        | N/A            | N/A                     | 5.5 (2.5 to 8.4), effect size: 0.48 |
|                                  | 2) 12 month intervention effect on physical functioning (SF-36) for somatization disorder, change score (95% CI)          | N/A            | N/A                     | 7.1 (3.5 to 10.7), effect size 0.61 |
|                                  | 3) 12 month intervention effect on physical functioning (SF-36) for abridged somatization disorder, change score (95% CI) | N/A            | N/A                     | 4.2 (1.5 to 6.9), effect size 0.37  |
|                                  | 4) 12 month intervention effect for mental health functioning (SF-36) for all 3 somatoform disorders                      | N/A            | N/A                     | NS                                  |
| Evans, C.E. (1986) [40]          | 1) Systolic pressure, mm Hg, Mean (SD)                                                                                    | 142.2 (21.0)   | 140.7 (11.3)            | NS                                  |
|                                  | 2) Diastolic pressure, mm Hg, Mean (SD)                                                                                   | 88.3 (11.2)    | 87.6 (5.5)              | NS                                  |
|                                  | 3) Patients with a mean diastolic blood pressure of <90 mm Hg, n(%) ** Outcome in M-A                                     | 45 (55.6%)     | 63 (61.8%)              | NS                                  |
|                                  | 4) Patients with a minimum diastolic blood pressure of <90 Hg, n(%)                                                       | 54 (66.7%)     | 68 (66.7%)              | NS                                  |
|                                  | 5) Control of blood pressure by Hypertension Detection and Follow-up Program criteria, n(%)                               | 44 (54.3%)     | 60 (58.8%)              | NS                                  |
| Hazard, R.G. (1997) [18]         | 1) No of patients out of work due to back pain, N (%) **Outcome in M-A                                                    | 6 (24.0%)      | 8 (28.6%)               | NS                                  |
| Kottke, T.E. (1989) [25]         | 1) Patient agrees to quit smoking, Average of the proportion of patients for each physician in group (SD)                 | 51.4 (24.9)    | 61.0 (29.0)             | NS                                  |
|                                  | 2) Patient attempts to quit smoking, average % (SD)                                                                       | 44.4 (12.6)    | 44.0 (9.6)              | NS                                  |
|                                  | 3) Patient's duration of cessation, average days (SD)                                                                     | 74.2 (35.8)    | 66.7 (63.1)             | NS                                  |
|                                  | 4) Patient not smoking at time of interview, average % (SD)                                                               | 14.3 (6.5)     | 12.0 (7.4)              | NS                                  |

|                                               |                                                                                                                               |                       |                       |                                       |
|-----------------------------------------------|-------------------------------------------------------------------------------------------------------------------------------|-----------------------|-----------------------|---------------------------------------|
|                                               | 5) Cessation verified by cotinine analysis, %<br>**Outcome in M-A                                                             | 5.0                   | 5.4                   | NS                                    |
| Liaw, S.T. (2008) [46]                        | 1) Ownership of a written asthma plan, n (%)                                                                                  | 35 (35.0%)            | 40 (38.1%)            | NS                                    |
|                                               | 2. A) Asthma Severity: Moderate/severe                                                                                        | 60 (61.2%)            | 63 (57.3%)            | NS                                    |
|                                               | B) Asthma Severity: Mild                                                                                                      | 38 (38.8%)            | 47 (42.7%)            | NS                                    |
|                                               | 3) Controlled Asthma, n (%)                                                                                                   | 57 (58.2%)            | 73 (66.4%)            | NS                                    |
|                                               | 4) Unscheduled visit to GP for asthma attack, n (%)                                                                           | 34 (35.8%)            | 28 (26.2%)            | NS                                    |
|                                               | 5) Visit to ED for asthma attack, n (%)                                                                                       | 8 (8.0%)              | 3 (2.8%)              | NS                                    |
|                                               | 6. A) Active quality of life caregiver report, mean (SD)                                                                      | 10.9 (1.8)            | 11.2 (1.5)            | NS                                    |
|                                               | B) Emotional quality of life caregiver report, mean (SD)                                                                      | 21.5 (3.5)            | 22.3 (2.9)            | NS                                    |
|                                               | 7) Quality of life, self-report of 11-14 year olds, total score, mean (SD)                                                    | 140.1 (37.6)          | 148.3 (27.2)          | NS                                    |
|                                               | 8. A) Quality of life, self-report of 7-10 year olds: active, mean (SD)                                                       | 29.0 (3.9)            | 30.4 (3.1)            | NS                                    |
|                                               | B) Passive, mean (SD)                                                                                                         | 14.4 (2.1)            | 17.9 (1.6)            | NS                                    |
|                                               | C) Distress, mean (SD)                                                                                                        | 30.6 (3.4)            | 29.9 (4.7)            | NS                                    |
|                                               | D) Severity, mean (SD)                                                                                                        | 15.7 (4.9)            | 12.3 (4.2)            | NS                                    |
|                                               | 9) Caregiver knowledge, Mean % correct (SD)                                                                                   | 66.65 (14.59)         | 65.29 (12.33)         | NS                                    |
| 10) Adolescent knowledge, Mean % correct (SD) | 63.42 (11.73)                                                                                                                 | 60.63 (14.50)         | NS                    |                                       |
| Shah, B. (2014) [42]                          | 1. A) Administrative Data Study Outcomes: Death or non-fatal myocardial infarction (Primary outcome), n/N(%) **Outcome in M-A | 11,536/466,076 (2.5%) | 11,736/467,713 (2.5%) | OR (95% CI): 1.00 (0.96–1.03), p=0.77 |
|                                               | B) All-cause death (Secondary outcomes – clinical events), n/N(%)                                                             | 8,704/466,076 (1.9%)  | 8,704/467,713 (1.9%)  | OR (95% CI): 0.98 (0.94–1.01), p=0.21 |
|                                               | C) Myocardial infarction (Secondary outcomes – clinical events), n/N(%)                                                       | 3,767/466,076 (0.8%)  | 3,944/467,713 (0.8%)  | OR (95% CI): 1.03 (0.97–1.08), p=0.34 |
|                                               | D) Myocardial infarction or unstable angina (Secondary outcomes – clinical events), n/N(%)                                    | 4,756/466,076 (1.0%)  | 5,002/467,713 (1.1%)  | OR (95% CI): 1.04 (0.99–1.09), p=0.15 |
|                                               | E) Stroke (Secondary outcomes – clinical events), n/N(%)                                                                      | 1,884/466,076 (0.4%)  | 1,863/467,713 (0.4%)  | OR (95% CI): 0.98 (0.91–1.04), p=0.45 |
|                                               | F) Stroke or transient ischemic attack (Secondary outcomes – clinical events), n/N(%)                                         | 2,273/466,076 (0.5%)  | 2,254/467,713 (0.5%)  | OR (95% CI): 0.98 (0.92–1.04), p=0.46 |

|                         |                                                                                                                                                           |                        |                       |                                       |
|-------------------------|-----------------------------------------------------------------------------------------------------------------------------------------------------------|------------------------|-----------------------|---------------------------------------|
|                         | G) Death, non-fatal myocardial infarction, non-fatal stroke (Secondary outcomes – clinical events), n/N(%)                                                | 12,773/466,076 (2.7%)  | 12,981/467,713 (2.8%) | OR (95% CI): 1.00 (0.97–1.03), p=0.77 |
|                         | H) Death, non-fatal myocardial infarction, non-fatal stroke, unstable angina, or transient ischemic attack (Secondary outcomes – clinical events), n/N(%) | 14,051/466,076 (3.0%)  | 14,330/467,713 (3.1%) | OR (95% CI): 1.00 (0.96–1.04), p=0.96 |
|                         | 2. A) Clinical Study Data Outcomes: HbA1c<=7.0% (Secondary outcomes – cardiovascular risk reduction), n/N(%)                                              | 469/797 (58.8%)        | 465/795 (58.5%)       | OR (95% CI): 0.93 (0.71–1.21), p=0.58 |
|                         | B) Blood pressure <=130/80 (Secondary outcomes – cardiovascular risk reduction), n/N(%)                                                                   | 506/797 (63.5%)        | 420/795 (52.8%)       | OR (95% CI): 0.72 (0.53–0.98), p=0.04 |
|                         | C) LDL-cholesterol <=2.0 mmol/l (Secondary outcomes – cardiovascular risk reduction), n/N(%)                                                              | 492/797 (61.7%)        | 471/795 (59.2%)       | OR (95% CI): 0.90 (0.68–1.18), p=0.43 |
|                         | D) Total- to HDL-cholesterol ratio <=4.0 (Secondary outcomes – cardiovascular risk reduction), n/N(%)                                                     | 612/797 (76.8%)        | 590/795 (74.2%)       | OR (95% CI): 0.85 (0.63–1.14), p=0.27 |
| Tsuji, S.R. (2007) [53] | 1) Clinical patient remission from depression (HAM-D <8), n/N (%) **Outcome in M-A                                                                        | 65/114 (57%)           | 84/120 (70%)          | p=0.004                               |
| Worrall, G. (1999) [37] | 1) Patient CES-D score at 6 months, Mean (SD)                                                                                                             | 19.4 (13.6) (Workshop) | 22.2 (11.7)           | NS                                    |
|                         | 2) Patient CES-D gain score at 6 months, Mean (SD)                                                                                                        | 19.3 (14.6) (Workshop) | 15.5 (14.8)           | Significant                           |
|                         | 3) Physician rating of patient depression at 6 months, Mean (SD)                                                                                          | 1.8 (0.7) (Workshop)   | 2.0 (0.7)             | NS                                    |
|                         | 4) Physician rating of patient depression gain score at 6 months, Mean (SD)                                                                               | 1.1 (0.1) (Workshop)   | 0.7 (0.1)             | Significant                           |
|                         | 5) Patients who took antidepressant for full 6 months, No. (%)                                                                                            | 42 (46.2) (Workshop)   | 21 (37.5)             | NS                                    |
|                         | 6) Patients taking medication at 6 months follow-up, No. (%)                                                                                              | 51 (56.0) (Workshop)   | 22 (39.3)             | Significant                           |

| <i>Physician Behaviour Outcomes</i> |                   |         |
|-------------------------------------|-------------------|---------|
| Author (Year)                       | Outcomes Examined | Results |

|                               |                                                                                                      | Control     | Experiment (PEM) | Effect Size and Significance |
|-------------------------------|------------------------------------------------------------------------------------------------------|-------------|------------------|------------------------------|
| Avorn, J. (1983) [19]         | 1. A) Drugs prescribed: Cephalexin, units                                                            | 1240        | 1434             | Mean difference: -100; NS    |
|                               | B) Proxyphene, units                                                                                 | 2626        | 2683             | Mean difference: -64; NS     |
|                               | C) Papaverine, units                                                                                 | 1055        | 953              | Mean difference: -104; NS    |
|                               | D) All 3 drugs, units                                                                                | 4921        | 5071             | Mean difference: -251; NS    |
| Bearcroft, P.W.P. (1994) [30] | 1) Requests for chest radiography contrary to guidelines, n(%)                                       | 87 (8.2%)   | 78 (5.7%)        | p=0.016                      |
|                               | 2) Requests for chest radiography with an inadequate history, n(%)                                   | 164 (15.5%) | 148 (10.9%)      | p=0.0008                     |
|                               | 3) Requests for chest radiography that indicated clinical diagnosis, n(%)                            | 454 (42.9%) | 668 (49.1%)      | p=0.0025                     |
|                               | 4) Requests for chest radiography that indicated smoking history                                     | 258 (24.4%) | 382 (28.0%)      | p=0.043                      |
| Bishop, P. (2006) [44]        | 1. A) Patient assessment: History items recorded this episode, %(N)                                  | 89% (149)   | 87% (162)        | NS                           |
|                               | B) History items recorded past episode, %(N)                                                         | 24% (149)   | 30% (162)        | NS                           |
|                               | C) Physical examination findings recorded for regional back exam, %(N)                               | 91% (149)   | 93% (162)        | NS                           |
|                               | D) Physical examination findings recorded for neurological exam, %(N)                                | 63% (149)   | 63% (162)        | NS                           |
|                               | E) Physical examination findings recorded for red flags, %(N)                                        | 5% (149)    | 4% (162)         | NS                           |
|                               | 2. A) Guideline concordant recommended treatment 0-4 weeks post onset: Education & reassurance, %(N) | 7% (149)    | 10% (162)        | NS                           |
|                               | B) Exercise, %(N)                                                                                    | 43% (149)   | 38% (162)        | NS                           |
|                               | C) Appropriate medication, %(N)                                                                      | 77% (149)   | 85% (162)        | NS                           |
|                               | D) Spinal manipulation, %(N)                                                                         | 6% (149)    | 2.5% (162)       | NS                           |

|                            |                                                                                                                                |               |              |                                  |
|----------------------------|--------------------------------------------------------------------------------------------------------------------------------|---------------|--------------|----------------------------------|
|                            | 3) Guideline discordant recommended treatment 0-4 weeks post onset: Bedrest >3 days, %(N)                                      | 17% (149)     | 10% (162)    | p=0.05                           |
|                            | 4. A) Guideline concordant recommended treatment 5-12 weeks post onset for supervised exercise program, %(N)                   | 14% (149)     | 19% (154)    | NS                               |
|                            | B) Return to work, %(N) **Outcome in M-A                                                                                       | 17% (149)     | 24% (154)    | NS                               |
|                            | C) Referral to interdisciplinary program, %(N)                                                                                 | 2% (149)      | 4% (154)     | Not clear                        |
|                            | 5) Guideline discordant recommended treatment 5-12 weeks post onset for physiotherapy >4 weeks, %(N)                           | 43% (149)     | 41% (154)    | 0.04                             |
| Bjornson, D.C. (1990) [17] | 1) Physicians switching patients to both hydralazine and isosorbide, n(%)                                                      | N/A           | N/A          | 5 (0.9%) (Control + PEM); p=0.15 |
|                            | 2) Physicians switching patients to at least one of the drugs or discontinued prazosin, n(%)                                   | N/A           | N/A          | 23 (4%) (Control + PEM); p=0.07  |
| Denig, P. (1990) [51]      | 1. A) Changes in Actual Prescribing of Antispasmodics: Undesirable antispasmodics, Mean daily doses per 1000 prescription (SD) | 29.0 (28.3)   | 25.6 (33.6)  | p=0.38                           |
|                            | B) All antispasmodics, Mean daily doses per 1000 prescription (SD)                                                             | 130.4 (101.2) | 115.7 (97.5) | p=0.28                           |
|                            | 2. A) Changes in stated prescribing for renal colic: Drugs advised against, Mean daily doses per 1000 prescription (SD)        | 29.1 (39.1)   | 17.5 (31.8)  | p=0.04                           |
|                            | B) Drugs recommended, Mean daily doses per 1000 prescription (SD)                                                              | 46.4 (39.2)   | 51.0 (43.5)  | p=0.09                           |
| Dormuth, C.R. (2004) [38]  | 1. A) Number of newly treated patients for analysis drugs where an increase is expected: Cimetidine, N                         | 25            | 45           | RR: 1.53                         |
|                            | B) Metronidazole/(amoxicillin or tetracycline), N                                                                              | 10            | 9            | RR: 2.57                         |
|                            | C) ASA/Ibuprofen/naproxen, N                                                                                                   | 121           | 131          | RR: 1.26                         |
|                            | D) Isosorbide dinitrate, N                                                                                                     | 4             | 7            | RR: 1.75                         |
|                            | E) Thiazide diuretics, N                                                                                                       | 50            | 69           | RR: 1.51                         |

|                       |                                                                                                                     |               |                |                                          |
|-----------------------|---------------------------------------------------------------------------------------------------------------------|---------------|----------------|------------------------------------------|
|                       | F) Inhaled corticosteroids, N                                                                                       | 4             | 11             | RR: 2.38                                 |
|                       | 2. A) Number of newly treated patients for analysis drugs where a decrease is expected: Calcium-channel blockers, N | 47            | 38             | 1/RR: 1.56                               |
|                       | B) Long-acting benzodiazepines, N                                                                                   | 191           | 161            | 1/RR: 1.22                               |
|                       | C) Hormones, N                                                                                                      | 87            | 106            | 1/RR: 1.04                               |
|                       | D) Calcium-channel blockers, N                                                                                      | 65            | 57             | 1/RR: 1.34                               |
|                       | E) Clonazepam/alprazolam/diazepam, N                                                                                | 40            | 47             | 1/RR: 1.19                               |
|                       | F) Finasteride, N                                                                                                   | 6             | 13             | 1/RR: 0.55                               |
|                       | 3) Combined effect of first two outcomes, N<br>**Outcome in M-A                                                     | 620           | 748            | RR: 1.29                                 |
| Downs, M. (2006) [33] | 1) Diagnosis of dementia concordance scores, Mean (SD)                                                              | 3.3 (2.0)     | 3.6 (1.4)      | NS                                       |
|                       | 2) Management of dementia concordance scores, Mean (SD), n **Outcome in M-A                                         | 1.3 (1.3), 73 | 1.5 (1.4), 102 | p=0.3                                    |
| Dubey, V. (2006) [41] | 1. A) Rates of preventive manoeuvres: Brushing/flossing, n(%)                                                       | 298 (6.7)     | 310 (47.9)     | Adjusted RR (95%CI)<br>9.19 (4.32-19.57) |
|                       | B) Blood pressure, n(%)                                                                                             | 298 (93.0)    | 310 (96.6)     | 1.05 (1.00-1.10)                         |
|                       | C) History of alcohol, n(%)                                                                                         | 298 (74.8)    | 310 (90.9)     | 1.33 (1.17-1.51)                         |
|                       | D) History of smoking, n(%)                                                                                         | 298 (79.2)    | 310 (92.4)     | 1.28 (1.16-1.42)                         |
|                       | E) Smoking cessation, n(%)                                                                                          | 71 (25.4)     | 45 (70.0)      | 3.93 (2.16-7.15)                         |
|                       | F) Tetanus immunization, n(%)                                                                                       | 297 (9.4)     | 308 (40.9)     | 3.00 (1.72-5.22)                         |
|                       | G) Folic acid counselling, n(%)                                                                                     | 125 (3.2)     | 119 (34.7)     | 7.47 (2.69-20.75)                        |

|                         |                                                                                                                                                       |                        |                  |                                      |
|-------------------------|-------------------------------------------------------------------------------------------------------------------------------------------------------|------------------------|------------------|--------------------------------------|
|                         | H) Rubella immunity, n(%)                                                                                                                             | 125 (9.6)              | 119 (34.7)       | 3.14 (0.78-12.62)                    |
|                         | I) Breast exam, n(%)                                                                                                                                  | 148 (77.7)             | 173 (97.4)       | 1.06 (0.97-1.16)                     |
|                         | J) Mammography, n(%)                                                                                                                                  | 16 (50.0)              | 50 (76.6)        | 1.41 (0.76-2.61)                     |
|                         | K) Pap smear, n(%)                                                                                                                                    | 145 (88.3)             | 164 (84.7)       | 0.92 (0.83-1.01)                     |
|                         | L) Fecal occult blood, n(%)                                                                                                                           | 67 (7.5)               | 102 (50.6)       | 6.69 (1.85-24.17)                    |
|                         | M) Hearing assessment, n(%)                                                                                                                           | 33 (12.1)              | 44 (41.2)        | 5.13 (0.70-37.32)                    |
|                         | 2) Percentage of up to date preventive health services delivered per patient, Mean (%) (95% CI)<br>**Outcome in M-A                                   | 48.9 (47.0-50.8)       | 71.7 (65.1-78.3) | Relative increase of 46.6%, p<0.0001 |
| Evans, C.E. (1986) [40] | 1) Patients on blood pressure medication, n(%)<br>**Outcome in M-A                                                                                    | 64 (79%)               | 77 (76%)         | NS                                   |
|                         | 2) Number of medications, Mean (SD)                                                                                                                   | 1.1 (0.74)             | 1.2 (0.85)       | NS                                   |
|                         | 3) Number of tablets per day prescribed, Mean (SD)                                                                                                    | 1.3 (1.0)              | 1.1 (0.99)       | NS                                   |
| Feng, B. (2013) [27]    | 1. A) Behaviours in shared decision making regarding prostate cancer or prostate cancer screening: Overall shared decision-making PCS score, Mean (N) | 13.5 (61) (Web course) | 10.7 (57)        | P<0.05                               |
|                         | B) Provision of information scale, Mean (N)                                                                                                           | 9.5 (61) (Web course)  | 8.2 (57)         | NS                                   |
|                         | C) Elicitation of patient's perspectives scale, Mean (N)                                                                                              | 2.5 (61) (Web course)  | 1.8 (57)         | NS                                   |
|                         | D) Guiding decision-making scale, Mean (N)                                                                                                            | 1.5 (61) (Web course)  | 0.7 (57)         | P<0.05                               |
|                         | 2. A) Summary of physician final clinical recommendations after prompting by unannounced standardized patient: Recommended in favour of PCS, % (N)    | 49                     | 68 (57)          | NS                                   |
|                         | B) Recommended against PCS, % (N)                                                                                                                     | 21 (61) (Web course)   | 11 (57)          | NS                                   |

|                            |                                                                                                                                                |                      |             |                                                                  |
|----------------------------|------------------------------------------------------------------------------------------------------------------------------------------------|----------------------|-------------|------------------------------------------------------------------|
|                            | C) Made no recommendation, % (N)                                                                                                               | 30 (61) (Web course) | 21 (57)     | NS                                                               |
|                            | D) Physician stated that he/she would order a PSA blood test, % (N)                                                                            | 31 (61) (Web course) | 60 (57)     | P<0.01                                                           |
| French, S. (2013) [47]     | 1. A) Effect of the intervention on imaging referral: X-ray referral, N                                                                        | 643 (Workshop)       | 768         | Incident rate ratios: 0.83, 95% CI: (0.61, 1.12), p-value: 0.211 |
|                            | B) CT-scan referral, N                                                                                                                         | 474 (Workshop)       | 496         |                                                                  |
|                            | C) X-ray or CT-scan referral, N **Outcome in M-A                                                                                               | 1117 (Workshop)      | 1264        |                                                                  |
| Guadagnoli, E. (2004) [22] | 1) Provide smoking cessation advice for acute myocardial infarction patients, %(N)                                                             | 76.1% (67)           | 67.4% (46)  | p=0.31                                                           |
|                            | 2) Advise to restrict salt intake for heart failure patients, %(N)                                                                             | 69.5% (164)          | 65.4% (159) | p=0.43                                                           |
|                            | 3. A) Diagnosis procedures for patients with acute myocardial infarction: perform cholesterol testing, % (N)                                   | 93.1% (277)          | 92.2% (232) | p=0.70                                                           |
|                            | B) Determine left ventricular ejection fraction, % (N)                                                                                         | 91.7 % (277)         | 91.8% (232) | p=0.96                                                           |
|                            | C) Assess symptoms of depression, % (N)                                                                                                        | 24.5% (277)          | 24.1% (232) | p=0.91                                                           |
|                            | 4. A) Diagnosis procedures for patients with heart failure: determine left ventricular ejection fraction, % (N)                                | 72.6% (164)          | 82.4% (159) | p=0.03                                                           |
|                            | B) Measure serum potassium level, % (N)                                                                                                        | 88.9% (117)          | 94.6% (110) | p=0.13                                                           |
|                            | C) Measure serum creatinine level, % (N)                                                                                                       | 86.4% (125)          | 88.0% (117) | p=0.70                                                           |
|                            | D) Assess patient weight, % (N)                                                                                                                | 91.5% (164)          | 94.9% (159) | p=0.21                                                           |
|                            | E) Assess for peripheral edema, % (N)                                                                                                          | 94.5% (164)          | 91.9% (159) | p=0.85                                                           |
|                            | 5) Acute myocardial infarction patients who received care in accordance with treatment recommendations composite score, Mean (no. of patients) | 0.77 (277)           | 0.77 (232)  | p=0.81                                                           |



|                         |                                                                                                                                                   |             |                       |         |
|-------------------------|---------------------------------------------------------------------------------------------------------------------------------------------------|-------------|-----------------------|---------|
|                         | 6) Heart failure patients who received care in accordance with treatment recommendations composite score, Mean (no. of patients) **Outcome in M-A | 0.81 (164)  | 0.83 (159)            | p=0.19  |
|                         | 7. A) Prescribing for patients with acute myocardial infarction: ACE inhibitor, %(N) **Outcome in M-A                                             | 66.7% (183) | 66.3% (160)           | p=0.94  |
|                         | B) Beta-blocker, %(N)                                                                                                                             | 92.7% (164) | 95.1% (141)           | p=0.40  |
|                         | C) Daily aspirin, %(N)                                                                                                                            | 98.5% (258) | 99.6% (223)           | p=0.23  |
|                         | 8. A) Prescribing for patients with acute myocardial infarction: ACE inhibitor, %(N)                                                              | 84.6% (39)  | 90.2% (51)            | p=0.42  |
|                         | B) Target ACE inhibitor, %(N)                                                                                                                     | 46.9% (32)  | 48.9% (45)            | p=0.86  |
|                         | C) Beta-blocker, %(N)                                                                                                                             | 75.0% (36)  | 77.1% (48)            | p=0.82  |
| Guthrie, B. (2013) [36] | 1. A) Change in trend after 2004 risk communication: Oral antipsychotic prescribed, % (95% CI)                                                    | N/A         | 0.54 (20.63 to 20.45) | p<0.001 |
|                         | B) Oral antipsychotic initiated, % (95% CI)                                                                                                       | N/A         | 0.03 (20.11 to 0.06)  | NS      |
|                         | C) Oral antipsychotic discontinued, % (95% CI)                                                                                                    | N/A         | 0.01 (20.12 to 0.10)  | NS      |
|                         | D) Hypnotic prescribed, % (95% CI)                                                                                                                | N/A         | 0.08 (-0.15 to 0.002) | NS      |
|                         | E) Anxiolytic prescribed, % (95% CI)                                                                                                              | N/A         | 0.02 (0.09 to 0.05)   | NS      |
|                         | F) Antidepressant prescribed, % (95% CI)                                                                                                          | N/A         | 0.18 (20.37 to 0.02)  | NS      |

|                          |                                                                                                                         |             |                        |          |
|--------------------------|-------------------------------------------------------------------------------------------------------------------------|-------------|------------------------|----------|
|                          | 2. A) Change in trend after 2009 risk communication: Oral antipsychotic prescribed, % (95% CI)                          | N/A         | 20.51 (20.64 to 20.37) | p<0.001  |
|                          | B) Oral antipsychotic initiated, % (95% CI)                                                                             | N/A         | 20.17 (20.28 to 20.06) | p<0.05   |
|                          | C) Oral antipsychotic discontinued, % (95% CI)                                                                          | N/A         | 0.08 (20.06 to 0.23)   | NS       |
|                          | D) Hypnotic prescribed, % (95% CI)                                                                                      | N/A         | 20.25 (20.37 to 20.13) | p<0.001  |
|                          | E) Anxiolytic prescribed, % (95% CI)                                                                                    | N/A         | 20.37 (20.47 to 20.26) | p<0.001  |
|                          | F) Antidepressant prescribed, % (95% CI)                                                                                | N/A         | 20.69 (20.99 to 20.38) | p<0.001  |
| Kottke, T.E. (1989) [25] | 1) Patient reports receiving supportive materials, average proportion of patients for each physician in group (SD)      | 10.6 (7.7)  | 36.4 (15.7)            | p<0.0001 |
|                          | 2) Patient reports being asked to quit, average proportion of patients for each physician in group (SD)**Outcome in M-A | 39.7 (14.2) | 54.9 (20.0)            | p<0.025  |
|                          | 3) Patient reports being asked for a quit date, average (SD)                                                            | 5.4 (17.3)  | 9.6 (19.5)             | p<0.005  |
|                          | 4) Patient reports being given follow-up appointment, average (SD)                                                      | 3.8 (5.5)   | 6.9 (10.1)             | NS       |
| Kunz, R. (2007) [48]     | 1) Discontinuation of discharge medication, % **Outcome in M-A                                                          | 29.40%      | 18.50%                 | p=0.039  |
| Liaw, S.T. (2008) [46]   | 1) Use of asthma action plan, n (%)**Outcome in M-A                                                                     | 6 (66.7)    | 13 (86.7)              | p=0.43   |

Matowe, L. (2002) [32]

|                                                                                                                                                  |     |     |                   |
|--------------------------------------------------------------------------------------------------------------------------------------------------|-----|-----|-------------------|
| 1. A) Change in general practitioners' radiography referral trend after 13 months: Total examinations, change in mean before guidelines (95% CI) | N/A | N/A | -1.8 (-11.9, 8.2) |
| B) Abdominal ultrasound, change in mean before guidelines (95% CI)                                                                               | N/A | N/A | <0.1 (-1.1, 1.1)  |
| C) Ankle X-rays, change in mean before guidelines (95% CI)                                                                                       | N/A | N/A | -0.2 (-0.6, 0.2)  |
| D) Barium meals, change in mean before guidelines (95% CI)                                                                                       | N/A | N/A | -0.1 (-1.2, 1.1)  |
| E) Chest X-rays, change in mean before guidelines (95% CI)                                                                                       | N/A | N/A | -0.6 (-4.3, 3.2)  |
| F) Cervical spine X-ray, change in mean before guidelines (95% CI)                                                                               | N/A | N/A | -0.6 (-4.3, 3.2)  |
| G) Foot and toe X-ray, change in mean before guidelines (95% CI)                                                                                 | N/A | N/A | -0.3 (-0.8, 0.1)  |
| H) Hand and finger X-ray, change in mean before guidelines (95% CI)                                                                              | N/A | N/A | 0.3 (-0.2, 0.7)   |
| I) Hip X-Ray, change in mean before guidelines (95% CI)                                                                                          | N/A | N/A | -0.4 (-1.0, 0.1)  |
| J) Kidney, uterus and bladder, change in mean before guidelines (95% CI)                                                                         | N/A | N/A | 0.2 (-0.2, 0.7)   |
| K) Knee X-Rays, change in mean before guidelines (95% CI)                                                                                        | N/A | N/A | -0.3 (-1.3, 0.6)  |
| L) Lumbar spine X-rays, change in mean before guidelines (95% CI)                                                                                | N/A | N/A | -0.4 (-1.2, 0.6)  |
| M) Pelvic ultrasound, change in mean before guidelines (95% CI)                                                                                  | N/A | N/A | 0.2 (-4.5, 0.9)   |
| N) Pelvis X-ray, change in mean before guidelines (95% CI)                                                                                       | N/A | N/A | -0.3 (-1.5, 0.9)  |
| O) Shoulder X-rays, change in mean before guidelines (95% CI)                                                                                    | N/A | N/A | <0.1 (-0.4, 0.4)  |
| P) Sinus X-rays, change in mean before guidelines (95% CI)                                                                                       | N/A | N/A | <0.1 (-0.3, 0.3)  |
| Q) Testicular ultrasound, change in mean before guidelines (95% CI)                                                                              | N/A | N/A | <0.1 (-0.5, 0.5)  |

|                                    |                                                                                                                                                       |                  |                 |                                       |
|------------------------------------|-------------------------------------------------------------------------------------------------------------------------------------------------------|------------------|-----------------|---------------------------------------|
|                                    | R) Thoracic spine X-rays, change in mean before guidelines (95% CI)                                                                                   | N/A              | N/A             | 0.3 (-0.1, 0.7)                       |
| McEwan, A. (2002) [35]             | 1) Rate of opportunistic advice per week, rate (SD)<br>**Outcome in M-A                                                                               | 2.8 (1.8)        | 4.9 (4.1)       | p=0.0025                              |
|                                    | 2) Rate of giving counselling, rate (SD)                                                                                                              | 1.0 (1.4)        | 2.2 (3.2)       | p=0.025                               |
|                                    | 3) Prescribing of nicotine replacement therapy, %                                                                                                     | 46%              | 54%             | p=0.12                                |
| Nicholas, J. (2009) [24]           | 1. A) Use of BMI percentiles to screen for childhood obesity for age 2-5, Mean (SE) ***Outcome in M-A                                                 | 2.79 (0.17)      | 3.13 (0.16)     | p=0.03                                |
|                                    | B) Age 6-11, Mean (SE)                                                                                                                                | 3.00 (0.18)      | 3.33 (0.16)     | p=0.07                                |
|                                    | C) Age 12-20, Mean (SE)                                                                                                                               | 3.12 (0.19)      | 3.46 (0.16)     | p=0.08                                |
| Oakeshott, P. (1994) [29]          | 1. A) Radiology requests per practice which conformed to guidelines: Limbs and joints, Mean %, difference from baseline (no. of practices)            | 83.6, -3.6 (15)  | 88.8, 3.1 (10)  | NS                                    |
|                                    | B) Chest, Mean %, difference from baseline (no. of practices)                                                                                         | 90.6, -2.9 (13)  | 92.9, 0.7 (13)  | NS                                    |
|                                    | C) Spine, Mean %, difference from baseline (no. of practices)                                                                                         | 33.5, -1.2 (14)  | 44.8, 5.3 (7)   | NS                                    |
|                                    | D) All requests, Mean %, difference from baseline (no. of practices)                                                                                  | 73.2, -1.7 (21)  | 83.5, 10.2 (22) | p<0.01                                |
| Perria, C. (2007) [56]             | 1) Metabolic control (assessment of glycaemic control based on 3 measurements), % (n/N)<br>**Outcome in M-A                                           | 10.3 (230/2232)  | 10.1 (222/2190) | OR (95% CI) for PEM: 0.93 (0.67-1.30) |
|                                    | 2. A) Test for Macrovascular Complications: Total, % (n/N)                                                                                            | 12.4 (277/2232)  | 11.7 (257/2190) | OR (95% CI) for PEM: 0.93 (0.70-1.24) |
|                                    | B) ECG, % (n/N)                                                                                                                                       | 24.2 (541/2232)  | 25.0 (547/2190) | N/A                                   |
|                                    | C) Lipid profile, % (n/N)                                                                                                                             | 30.3 (677/2232)  | 28.5 (624/2190) | N/A                                   |
|                                    | 3. A) Test for Microvascular Complications: Total, % (n/N)                                                                                            | 4.7 (105/2232)   | 4.9 (108/2190)  | OR (95% CI) for PEM: 1.11 (0.73-1.69) |
|                                    | B) Retinal Screening, % (n/N)                                                                                                                         | 22.7 (507/2232)  | 23.9 (523/2190) | N/A                                   |
|                                    | C) Microalbuminuria, % (n/N)                                                                                                                          | 11.9 (265/2232)  | 10.5 (229/2190) | N/A                                   |
| D) Creatinine serum level, % (n/N) | 50.4 (1124/2232)                                                                                                                                      | 51.6 (1129/2190) | N/A             |                                       |
| Rabin, D. (1994) [20]              | 1. A) Physician reported frequency of questioning new patients about risk factors for sexually transmitted diseases (STDs) and HIV infection: History | -0.06            | 0.05            | p=0.14                                |

|                                                                                                                                                                                                                                                |      |      |         |
|------------------------------------------------------------------------------------------------------------------------------------------------------------------------------------------------------------------------------------------------|------|------|---------|
| of STD; Mean (SD) before intervention: 3.96 (1.18),<br>Difference between means before and after<br>intervention                                                                                                                               |      |      |         |
| B) Intravenous drug use; Mean (SD) before<br>intervention: 3.62 (1.33)                                                                                                                                                                         | 0.19 | 0.34 | p=0.28  |
| C) Condom Use; Mean (SD) before intervention: 3.44<br>(1.29)                                                                                                                                                                                   | 0.19 | 0.25 | p=0.07  |
| D) Sexual orientation; Mean (SD) before intervention:<br>3.29 (1.38)                                                                                                                                                                           | 0.16 | 0.04 | p<0.001 |
| E) Sexual partner's history of intravenous drug use;<br>Mean (SD) before intervention: 2.94 (1.35)                                                                                                                                             | 0.07 | 0.25 | p=0.02  |
| F) Sexual partner's STD and HIV status; Mean (SD)<br>before intervention: 2.89 (1.25)                                                                                                                                                          | 0.08 | 0.23 | p=0.34  |
| G) Anal or oral sex; Mean (SD) before intervention:<br>2.71 (1.19)                                                                                                                                                                             | 0.08 | 0.34 | p=.008  |
| H) Number of sexual partner; Mean (SD) before<br>intervention: 2.65 (1.21)                                                                                                                                                                     | 0.23 | 0.14 | p=0.04  |
| 2. A) Physicians observed to conduct risk questioning<br>for sexually transmitted diseases and HIV infection:<br>History of STD (%)                                                                                                            | 26   | 35   | p=0.14  |
| B) Intravenous drug use, (%)                                                                                                                                                                                                                   | 15   | 26   | p=0.32  |
| C) Condom Use, (%)                                                                                                                                                                                                                             | 20   | 26   | p=0.04  |
| D) Sexual orientation, (%)**Outcome in M-A                                                                                                                                                                                                     | 9    | 7    | p=0.10  |
| E) Number of sexual partners, (%)                                                                                                                                                                                                              | 38   | 50   | p=0.29  |
| F) Sexual partner's history of intravenous drug use,<br>(%)                                                                                                                                                                                    | 32   | 47   | p=0.26  |
| G) Sexual partner's STD and HIV status, (%)                                                                                                                                                                                                    | 44   | 52   | p=0.33  |
| H) Oral sex practices, (%)                                                                                                                                                                                                                     | 8    | 17   | p=0.001 |
| I) Anal sex practices, (%)                                                                                                                                                                                                                     | 9    | 19   | p=0.002 |
| 3. A) Physician reported frequency of STD and HIV<br>infection prevention advice for women at risk:<br>Condom for vaginal intercourse; Mean (SD) before<br>intervention: 3.97(1.26), Difference between means<br>before and after intervention | 0.07 | 0.05 | p=0.001 |
| B) Condom for anal intercourse; Mean (SD) before                                                                                                                                                                                               | 0.11 | 0.29 | p=0.02  |

|                       |                                                                                                                      |                         |                         |                                                                   |
|-----------------------|----------------------------------------------------------------------------------------------------------------------|-------------------------|-------------------------|-------------------------------------------------------------------|
|                       | intervention: 3.74(1.69)                                                                                             |                         |                         |                                                                   |
|                       | C) Limit number of partners; Mean (SD) before intervention: 3.48 (1.52)                                              | 0.004                   | 0.17                    | p=0.13                                                            |
|                       | D) Monogamous; Mean (SD) before intervention: 3.23(1.54)                                                             | 0.01                    | 0.11                    | p=0.03                                                            |
|                       | E) Condom for oral intercourse; Mean (SD) before intervention: 2.69(1.64)                                            | 0                       | 0.17                    | p=0.005                                                           |
|                       | 4. A) Physician observed to provide prevention advice and information on STDs and HIV infection: Use condoms, %      | 89                      | 88                      | p=0.04                                                            |
|                       | B) Use condom for anal sex, %                                                                                        | 8                       | 9                       | p=0.10                                                            |
|                       | C) Limit number of partners, %                                                                                       | 54                      | 54                      | p=0.99                                                            |
|                       | D) Be Monogamous, %                                                                                                  | 49                      | 47                      | p=0.73                                                            |
|                       | E) Use condom for oral sex, %                                                                                        | 13                      | 19                      | p=0.08                                                            |
|                       | F) Educational materials on condoms, %                                                                               | 3                       | 7                       | p=0.004                                                           |
| Rahme, E. (2005) [39] | 1. A) Adequate prescriptions: All prescriptions, n/N (%)                                                             | 593/1209 (49)           | 712/1317 (54)           | Ratio of odds ratio (95% CI): 1.1 (0.6, 1.6), Probability OR>1=55 |
|                       | B) Acetaminophen, n/N (%)                                                                                            | 399/399 (100)           | 462/462 (100)           | N/A                                                               |
|                       | C) NSAIDs, n/N (%)                                                                                                   | 8/123 (7)               | 10/103 (10)             | N/A                                                               |
|                       | D) COX-2 inhibitors, n/N (%)                                                                                         | 186/687 (27)            | 240/752 (32)            | N/A                                                               |
| Shah, B. (2014) [42]  | 1. A) Administrative data study: Electrocardiogram (Secondary outcomes – Coronary Artery Disease assessment), n/N(%) | 187,391/466,076 (40.2%) | 181,404/467,713 (38.8%) | OR (95% CI): 0.96 (0.93–0.99), p=0.02                             |
|                       | B) Cardiac stress test or nuclear imaging (Secondary outcomes – Coronary Artery Disease assessment), n/N(%)          | 37,918/466,076 (8.1%)   | 36,373/467,713 (7.8%)   | 0.96 (0.93–1.00), 0.04                                            |
|                       | C) Coronary angiography (Secondary outcomes – Coronary Artery Disease assessment), n/N(%)                            | 7,450/466,076 (1.6%)    | 7,633/467,713 (1.6%)    | 1.00 (0.96–1.05), 0.83                                            |
|                       | D) Cardiology or internal medicine visit (Secondary outcomes – Coronary Artery Disease assessment), n/N(%)           | 98,944/466,076 (21.2%)  | 97,193/467,713 (20.8%)  | 0.97 (0.94–1.00), 0.07                                            |
|                       | E) ACEI/ARB (Secondary outcomes – medication initiation), n/N(%)                                                     | 6,843/56,657 (11.2%)    | 6,462/58,478 (11.1%)    | 0.99 (0.95–1.03), 0.65                                            |

|                          |                                                                                                         |                      |                      |                                   |
|--------------------------|---------------------------------------------------------------------------------------------------------|----------------------|----------------------|-----------------------------------|
|                          | F) <=1 antihypertensive class (Secondary outcomes – medication initiation), n/N(%)                      | 4,403/31,133 (14.1%) | 4,451/31,825 (14.0%) | 0.99 (0.94–1.04), 0.64            |
|                          | G) <=2 antihypertensive classes (Secondary outcomes – medication initiation), n/N(%)                    | 7,463/77,152 (9.7%)  | 7,712/79,129 (9.7%)  | 1.01 (0.97–1.05), 0.59            |
|                          | H) <=3 antihypertensive classes (Secondary outcomes – medication initiation), n/N(%)                    | 8,176/140,271 (5.8%) | 8,377/143,563 (5.8%) | 1.00 (0.96–1.04), 0.94            |
|                          | I) Statin (Secondary outcomes – medication initiation), n/N(%)                                          | 7,967/63,891 (12.5%) | 8,091/65,391 (12.4%) | 1.00 (0.96–1.04), 0.94            |
|                          | J) Glucose-lowering drug (Secondary outcomes – medication initiation), n/N(%)                           | 6,123/81,047 (7.6%)  | 6,261/81,565 (7.7%)  | 1.02 (0.98–1.07), 0.37            |
|                          | K) Insulin (Secondary outcomes – medication initiation), n/N(%)                                         | 3,945/183,622 (2.1%) | 4,085/185,311 (2.2%) | 1.02 (0.97–1.08), 0.44            |
|                          | L) Nitrate (Secondary outcomes – medication initiation), n/N(%)                                         | 8,936/185,310 (4.8%) | 8,726/187,950 (4.6%) | 0.96 (0.92–1.00), 0.03            |
|                          | 2. A) Clinical study data: Prescription for statin (primary outcome), n/N(%) **Outcome in M-A           | 725/797 (91.0%)      | 700/795 (88.1%)      | 0.73 (0.42–1.26), 0.26            |
|                          | B) Prescription for ACEI/ARB (Secondary outcomes – cardiovascular risk reduction), n/N(%)               | 689/797 (86.4%)      | 671/795 (84.4%)      | 0.77 (0.51–1.15), 0.20            |
|                          | C) When HbA1c>8.0% (Secondary outcomes – clinical inertia), n/N(%)                                      | 25/192 (13.0%)       | 20/170 (11.8%)       | 0.98 (0.48–1.98), 0.95            |
|                          | D) When blood pressure>140/90 (Secondary outcomes – clinical inertia), n/N(%)                           | 27/371 (7.2%)        | 21/337 (5.6%)        | 0.67 (0.25–1.82), 0.43            |
|                          | E) When LDL-cholesterol>3.0 mmol/l (Secondary outcomes – clinical inertia), n/N(%)                      | 52/115 (45.2%)       | 54/124 (43.5%)       | 0.94 (0.53–1.67), 0.83            |
| Tsuji, S.R. (2007) [53]  | 1) Appropriate treatment (prescribing of antidepressants), n/N(%) **Outcome in M-A                      | 100/114 (57.7%)      | 119/120 (99.2%)      | p=0.154                           |
| Tziraki, C. (2000)       | 1) Practice adherence to nutrition advice guidelines, Mean adherence score (95% CI)                     | 52.3 (51-54)         | 53 (52-55)           | NS                                |
|                          | 2) Adherence to nutrition screening, Mean adherence score (95% CI)                                      | 20.5 (20-21)         | 21 (19-23)           | NS                                |
| Ulbricht, S. (2014) [50] | 1) Number of GPs who did not refer patients in case of prescription drug abuse, n(%)                    | 214 (53.9)           | 230 (50.5)           | N/A                               |
|                          | 2) Number of GPs who did not provide treatment in case of prescription drug abuse, n(%)**Outcome in M-A | 56 (14.1)            | 60 (13.2)            | N/A                               |
| Watson, M. (2001) [28]   | 1) Prescribing of recommended 3 NSAIDs as a % of total NSAID prescribing, Mean (SD) **Outcome in M-     | 81.2 (3.7)           | 80.3 (7.2)           | Adjusted mean difference (95% CI) |

|                             |                                                                                                                                                                                           |                                       |                                                    |                                           |
|-----------------------------|-------------------------------------------------------------------------------------------------------------------------------------------------------------------------------------------|---------------------------------------|----------------------------------------------------|-------------------------------------------|
|                             | A                                                                                                                                                                                         |                                       |                                                    | for PEM vs. control:<br>0.4 (-2.8 to 3.7) |
|                             | 2) Prescribing of top 5 NSAIDs as a % of total NSAID prescribing, Mean (SD)                                                                                                               | 91.0 (2.5)                            | 90.4 (3.2)                                         | 0.7 (-0.8 to 2.3)                         |
|                             | 3) Prescribing of ibuprofen (Defined Daily Doses (DDDs) per 1000 specific therapeutic group age-sex-related prescribing unit (STAR-PU)), Mean (SD)                                        | 195 (34)                              | 166 (42)                                           | 8.5 (-14.7 to 31.8)                       |
|                             | 4) Prescribing of ibuprofen, % of total DDDs, Mean (SD)                                                                                                                                   | 27.7 (4.2)                            | 26.0 (7.6)                                         | 2.1 (-1.2 to 5.3)                         |
|                             | 5) Total volume of NSAID prescribing, DDDs per 1000 STAR-PU, Mean (SD)                                                                                                                    | 709 (100)                             | 657 (151)                                          | -14 (-69 to 40)                           |
|                             | 6) Prescribing of azapropazone, DDDs per 1000 STAR-PU                                                                                                                                     | 6.4 (5.4)                             | 2.5 (1.7)                                          | -1.9 (-4.7 to 0.8)                        |
| Worrall, G. (1999) [37]     | 1) Correct diagnoses of depression, n(%)                                                                                                                                                  | 53 (93.4%)<br>(Workshop)              | 84 (94.6%)                                         | NS                                        |
|                             | 2) Patients prescribed antidepressant on first visit, n(%)                                                                                                                                | 83 (91.2%)<br>(Workshop intervention) | 50 (89.3%)                                         | NS                                        |
|                             | 3. A) Number of referrals to: Psychiatrist, n<br>**Outcome in M-A                                                                                                                         | 6 (workshop)                          | 2                                                  | NS                                        |
|                             | B) Other mental health professional, n<br>**Outcome in M-A                                                                                                                                | 8 (workshop)                          | 0                                                  | NS                                        |
| Wright, N.M.J. (2004) [31]  | 1. A) Number of items prescribed monthly:<br>Chlorpromazine hydrochloride, Mean (95% CI)                                                                                                  | N/A                                   | 160 (-10 to 320)                                   | p=0.06                                    |
|                             | B) Haloperidol, Mean (95% CI)                                                                                                                                                             | N/A                                   | 120 (60 to 180)                                    | p<0.001                                   |
|                             | C) Olanzapine, Mean (95% CI)                                                                                                                                                              | N/A                                   | 60 (-40 to 160),                                   | p=0.2                                     |
|                             | D) Risperidone, Mean (95% CI)                                                                                                                                                             | N/A                                   | 50 (-90 to 180),                                   | p=0.5                                     |
|                             | E) Thioridazine, Mean (95% CI)                                                                                                                                                            | N/A                                   | -810 (-1200 to -420)                               | p<0.001                                   |
| Zwarenstein, M. (2014) [58] | 1) Percentage of patients obtaining retinal screening within 90 days of mail out, Median success rate % (25 <sup>th</sup> and 75 <sup>th</sup> percentile success rates) **Outcome in M-A | 31.0 (25.0, 37.0)                     | Insert: 30.9 (25.3, 37.8);<br>Outsert, no reminder | 0.96                                      |



|  |  |  |                                                                                                                                                                                                                                                                             |  |
|--|--|--|-----------------------------------------------------------------------------------------------------------------------------------------------------------------------------------------------------------------------------------------------------------------------------|--|
|  |  |  | notepad: 30.8<br>(25.0, 37.1);<br>Outsert and<br>reminder pad:<br>30.4 (25.0, 37.5);<br>Insert and<br>outsert, no<br>reminder<br>notepad: 30.3<br>(25.0, 37.3);<br>Insert and<br>outsert and<br>reminder<br>notepad: 30.4<br>(25.0, 37.5);<br>Overall: 30.8<br>(25.0, 37.5) |  |
|--|--|--|-----------------------------------------------------------------------------------------------------------------------------------------------------------------------------------------------------------------------------------------------------------------------------|--|

| <b>Physician Cognition Outcomes</b> |                                                                                                                                                       |                |                         |                                     |
|-------------------------------------|-------------------------------------------------------------------------------------------------------------------------------------------------------|----------------|-------------------------|-------------------------------------|
| <b>Author (Year)</b>                | <b>Outcomes Examined</b>                                                                                                                              | <b>Results</b> |                         |                                     |
|                                     |                                                                                                                                                       | <b>Control</b> | <b>Experiment (PEM)</b> | <b>Effect Size and Significance</b> |
| Butzlaff, M. (2003) [49]            | 1) Number of participants with knowledge increase between the intervention and control                                                                | N/A            | N/A                     | p=0.50                              |
| Denig, P. (1990) [51]               | 1. A) Changes in perceived drug utility, on a scale of 1-10: Butylscopolamine suppositories (advised against) for irritable bowel syndrome, Mean (SD) | 5.1 (2.6)      | 4.7 (2.9)               | p=0.23                              |
|                                     | B) Chlordiazepoxide combination tablets (advised against) for irritable bowel syndrome, Mean (SD)                                                     | 4.3 (2.3)      | 3.9 (2.6)               | p=0.22                              |
|                                     | C) Metamizole combination tablets (advised against) for renal colic, Mean (SD)                                                                        | 6.6 (2.5)      | 5.5 (2.8)               | p=0.03                              |
|                                     | D) Diclofenac injections (recommended) for renal colic, Mean (SD)                                                                                     | 7.2 (1.8)      | 7.4 (1.8),              | p=0.15                              |

|                          |                                                                                                                    |                                                                                                   |                                                                                                       |                                                                 |
|--------------------------|--------------------------------------------------------------------------------------------------------------------|---------------------------------------------------------------------------------------------------|-------------------------------------------------------------------------------------------------------|-----------------------------------------------------------------|
|                          | 2. A) Changes in knowledge: Improved knowledge on IBS, # of physicians (%)                                         | 9 (20.9%)                                                                                         | 11 (26.8%)                                                                                            | p>0.05                                                          |
|                          | B) Improved knowledge on Renal Colic, # of physicians (%)<br>**Outcome in M-A                                      | 9 (37.5%)                                                                                         | 20 (81.4%)                                                                                            | p<0.02                                                          |
| French, S. (2013) [47]   | 1. A) Effect of the intervention on clinical behaviours as measured by response to vignettes: X-ray adherence, n/N | 126/152<br>(Workshop)                                                                             | 109/160                                                                                               | Adjusted odds ratio: 1.76, 95% CI: (1.01, 3.05), p-value: 0.045 |
|                          | B) Imaging adherence, n/N                                                                                          | 119/152<br>(Workshop)                                                                             | 89/160                                                                                                | 2.36 (1.48, 3.79), 0.000                                        |
|                          | C) Activity adherence, n/N                                                                                         | 121/152<br>(Workshop)                                                                             | 82/160                                                                                                | 4.49, (1.90, 10.60), 0.001                                      |
|                          | D) Bed rest adherence, n/N                                                                                         | 163/164<br>(Workshop)                                                                             | 168/171                                                                                               | 2.91, (0.30, 27.83), 0.354                                      |
| Hunskaar, S. (1996) [55] | 1. Views on prescribing oestrogen based on case history number 1-9, median (interquartile range)                   | 1) 4(3-4), 2) 3(2-4), 3) 2(1-3), 4) 3(2-4), 5) 3(1-3), 6) 4(4-5), 7) 4(3-5), 8) 5(4-5), 9) 4(3-4) | 1) 4(3-4), 2) 3(2-4), 3) 2.5(1-3), 4) 3(2-4), 5) 3(1.5-3), 6) 5(4-5), 7) 4(3-5), 8) 5(4-5), 9) 4(3-5) | NS                                                              |
| Liaw, S.T. (2008) [46]   | 1) Identification of a child with asthma that may be high risk, % of correct responses out of 10, mean (SD)        | 82.2 (8.3)                                                                                        | 89.3 (9.6)                                                                                            | Significant                                                     |
|                          | 2) Assessment of severity of acute attack, % of correct responses out of 11, mean (SD)                             | 33.8 (13.3)                                                                                       | 40.1 (17.3)                                                                                           | p=0.05                                                          |
|                          | 3. A) Confidence in management of: Acute attack, n(%)                                                              | 5 (55.6) Very confident, 3 (33.3) Confident, 1 (11.1) Not very confident                          | 12 (80.0) Very confident, 3 (20.0) Confident                                                          | p=0.09                                                          |
|                          | B) Moderate acute attack, n(%)                                                                                     | 4 (50.0) Very confident, 3 (37.5)                                                                 | 11 (78.6) Very confident, 3                                                                           | p=0.30                                                          |

|                          |                                                                                                                                     |                                                                           |                                                                          |        |
|--------------------------|-------------------------------------------------------------------------------------------------------------------------------------|---------------------------------------------------------------------------|--------------------------------------------------------------------------|--------|
|                          |                                                                                                                                     | Confident, 1 (12.5) Not very confident                                    | (21.4) Confident;                                                        |        |
|                          | C) Severe/critical attack, n(%)                                                                                                     | 3 (33.3) Very confident, 3 (33.3) Confident, 3 (33.3) Not very confident  | 3 (20.0) Very confident, 7 (46.7) Confident, 5 (33.3) Not very confident | p=0.58 |
|                          | 4. A) Ongoing management of: Infrequent episodic asthma, n(%)                                                                       | 3 (33.3) Very confident, 5 (55.6) Confident, 11 (11.1) Not very confident | 9 (60.0) Very confident, 6 (40.0) Confident                              | p=0.03 |
|                          | B) Frequent episodic asthma, n(%)                                                                                                   | 3 (33.3) Very confident, 5 (55.6) Confident, 1 (11.1) Not very confident  | CPG: 6 (40.0) Very confident, 9 (60.0) Confident                         | p=0.49 |
|                          | C) Persistent asthma, n(%)                                                                                                          | 3 (33.3) Very confident, 5 (55.6) Confident, 1 (11.1) Not very confident  | 5 (33.3) Very confident, 8 (53.3) Confident, 2 (13.3) Not very confident | p=0.73 |
|                          | 5) Knowledge about asthma, % correct out of 21, Mean (SD)<br>**Outcome in M-A                                                       | 70.2 (14.5)                                                               | 71.1 (11.6) CPG                                                          | p=0.06 |
| Mukohara, K. (2005) [26] | 1. A) Self-reported skills: Critical appraisal, Mean change (95% CI)                                                                | 0.07 (-0.02 to 0.17)                                                      | 0.07 (0.00 to 0.13)                                                      | p=0.9  |
|                          | B) Evidence-based medicine quantitative skills, Mean change (95% CI)                                                                | 0.1 (-0.05 to 0.3)                                                        | 0.1 (-0.01 to 0.2)                                                       | p=0.9  |
| Secher, N. (2012) [52]   | 1. A) Correct answers to questions on basic life support and the use of an automated external defibrillator: Diagnosis of a cardiac | 70 (27.7%)                                                                | 58 (26.8%)                                                               | p=0.84 |

|                        |                                                                                                                             |                  |                  |          |
|------------------------|-----------------------------------------------------------------------------------------------------------------------------|------------------|------------------|----------|
|                        | arrest, n(%)                                                                                                                |                  |                  |          |
|                        | B) The first action to take when a person has cardiac arrest in your clinic, n(%)                                           | 79 (31.3%)       | 73 (33.7%)       | p=0.62   |
|                        | C) Recommended compression depth, n(%)                                                                                      | 100 (39.5%)      | 143 (66.2%)      | p=<0.001 |
|                        | D) Recommended compression frequency, n(%)                                                                                  | 95 (37.7%)       | 133 (61.6%)      | p=<0.001 |
|                        | E) Recommended compression ventilation ratio, n(%)                                                                          | 176 (69.8%)      | 162 (75.0%)      | p=0.25   |
|                        | F) Recommended volume for ventilation, n(%)                                                                                 | 231 (91.7%)      | 190 (88.0%)      | p=0.22   |
|                        | G) When to place a person in the recovery position, n(%)<br>**Outcome in M-A                                                | 240 (95.2%)      | 200 (92.6%)      | p=0.25   |
|                        | H) When to use an automated external defibrillator at a cardiac arrest, N(%)                                                | 220 (87.3%)      | 184 (85.2%)      | p=0.67   |
|                        | I) How to place the automated external defibrillator pads, n(%)                                                             | 224 (88.9%)      | 183 (84.7%)      | p=0.22   |
|                        | 2. A) Self-evaluation skills: "I feel confident performing basic life support", mean Likert score (SD), %                   | 4.4 (0.6), 94.4% | 4.4 (0.6), 95.8% | p=0.81   |
|                        | B) "I feel I can handle a person with cardiac arrest in my clinic", mean Likert score (SD), %                               | 4.1 (0.7), 87.7% | 4.2 (0.7), 88.8% | p=0.38   |
|                        | C) "I think more BLS training relevant for general physicians are needed", mean Likert score (SD), %                        | 3.5 (1.1), 55.4% | 3.6 (1.0), 59.7% | p=0.50   |
| Simon A.E. (2010) [54] | 1. A) Diagnosis test questionnaire with all responses included at 6 months, mean score (n): A) at 6 months **Outcome in M-A | 5.63 (149)       | 6.64 (176)       | p<0.001  |
|                        | B) Diagnosis test questionnaire with all responses included at 12 months, mean score (n)                                    | 5.53 (146)       | 6.06 (174)       | p=0.046  |
| Szonyi, G. (1993) [45] | 1) Score on incontinence knowledge questionnaire, scored with negative marking, % score (SD) **Outcome in M-A               | 33 (17)          | 60 (19)          | p<0.001  |
| Watson, E. (2001) [34] | 1) GPs making correct referral decisions on at least 5 of 6 family history vignettes, %(n) **Outcome in M-A                 | 38.9 (63)        | 80.6 (100)       | p<0.001  |
