# Supplementary material for: What is the effectiveness of printed educational materials on primary care physician knowledge, behaviour, and patient outcomes: a systematic review and meta-analyses
Source: Springer Nature journal article supplement (doi:10.1186/s13012-015-0347-5), 2015-12-01
Supplement: MOESM4 [file 9773224]

### Additional file 4: Appraisal of Risk of Bias of Included RCT studies Using Cochrane EPOC Risk of Bias Assessment Tool

| Study                    | Risk of Bias          |                        |                              |                                     |                         |                                      |                                  |                             |       |
|--------------------------|-----------------------|------------------------|------------------------------|-------------------------------------|-------------------------|--------------------------------------|----------------------------------|-----------------------------|-------|
|                          | Allocation generation | Allocation concealment | Baseline outcome measurement | Baseline characteristic measurement | Incomplete outcome data | Knowledge of allocated interventions | Protection against contamination | Selective outcome reporting | Other |
| Avorn, J. (1983)         | Unclear               | Low                    | Low                          | Unclear                             | Low                     | Low                                  | Low                              | Low                         | High  |
| Bearcroft, P.W.P. (1994) | Low                   | Low                    | Unclear                      | High                                | Unclear                 | Low                                  | Low                              | Low                         | Low   |
| Bishop, P. (2006)        | Low                   | Unclear                | Unclear                      | Unclear                             | Low                     | Unclear                              | High                             | Unclear                     | High  |
| Bjornson, D.C. (1990)    | Unclear               | Unclear                | Unclear                      | Unclear                             | High                    | High                                 | Unclear                          | Low                         | Low   |
| Butzlaff, M. (2003)      | Low                   | Low                    | Low                          | Unclear                             | Low                     | High                                 | Low                              | Low                         | Low   |
| Denig, P. (1990)         | Unclear               | High                   | High                         | Unclear                             | Low                     | High                                 | Low                              | Low                         | Low   |
| Dickinson, W.P. (2003)   | Unclear               | High                   | Low                          | Low                                 | Low                     | Unclear                              | High                             | High                        | High  |
| Dormuth, C.R. (2004)     | Low                   | Low                    | Unclear                      | Low                                 | Low                     | Low                                  | Low                              | Low                         | Low   |
| Downs, M. (2006)         | Low                   | Low                    | Low                          | High                                | Low                     | Unclear                              | Low                              | Low                         | High  |
| Dubey, V. (2006)         | Low                   | Low                    | Low                          | Low                                 | Low                     | Low                                  | Low                              | Low                         | Low   |
| Evans, C.E. (1986)       | Unclear               | Low                    | Low                          | Unclear                             | Low                     | Low                                  | Low                              | High                        | Low   |
| Feng, B. (2013)          | Unclear               | Unclear                | High                         | Unclear                             | Unclear                 | Low                                  | Unclear                          | Low                         | High  |
| French, S. (2013)        | Low                   | Low                    | Unclear                      | High                                | Low                     | Low                                  | Low                              | Low                         | Low   |
| Guadagnoli, E. (2004)    | Low                   | Low                    | Unclear                      | Low                                 | Low                     | Unclear                              | Unclear                          | Low                         | High  |
| Hazard, R.G. (1997)      | Low                   | High                   | Unclear                      | High                                | Low                     | High                                 | High                             | High                        | High  |
| Hunnskaar, S. (1996)     | Low                   | Low                    | High                         | High                                | Unclear                 | High                                 | Unclear                          | Low                         | High  |
| Kottke, T.E. (1989)      | Unclear               | Low                    | High                         | High                                | Unclear                 | Unclear                              | Low                              | Unclear                     | Low   |
| Kunz, R. (2007)          | Low                   | Low                    | Unclear                      | High                                | High                    | High                                 | Low                              | Low                         | High  |
| Liaw S.T. (2008)         | Low                   | Low                    | Low                          | High                                | Low                     | High                                 | Low                              | Low                         | Low   |
| McEwan A. (2002)         | Unclear               | Low                    | Unclear                      | Low                                 | Low                     | High                                 | Low                              | Low                         | High  |
| Mukohara, K. (2005)      | Low                   | High                   | Low                          | Low                                 | Low                     | High                                 | Unclear                          | Low                         | Low   |
| Nicholas, J. (2009)      | Unclear               | Unclear                | Low                          | Low                                 | Low                     | High                                 | Unclear                          | Low                         | Low   |
| Oakeshott, P. (1994)     | Unclear               | Low                    | Unclear                      | High                                | Low                     | Low                                  | Low                              | Low                         | Low   |
| Perria C. (2007)         | Low                   | Low                    | Low                          | Low                                 | High                    | Low                                  | Low                              | High                        | Low   |
| Rabin, D. (1994)         | Low                   | High                   | Low                          | Low                                 | Low                     | Unclear                              | High                             | Unclear                     | High  |
| Rahme, E. (2005)         | Unclear               | Unclear                | Low                          | Low                                 | Low                     | High                                 | Low                              | Low                         | High  |
| Secher, N. (2012)        | Low                   | Low                    | Unclear                      | Low                                 | Low                     | High                                 | Low                              | Low                         | High  |
| Shah, B. (2014)          | Low                   | Low                    | Low                          | Low                                 | Low                     | Low                                  | Low                              | Low                         | Low   |
| Simon, A.E. (2010)       | High                  | Unclear                | Low                          | High                                | Low                     | High                                 | High                             | High                        | Low   |
| Szonyi, G. (1994)        | Low                   | Unclear                | Low                          | High                                | High                    | Unclear                              | Unclear                          | Low                         | High  |
| Tsuji, S.R. (2007)       | Unclear               | Low                    | High                         | Low                                 | Low                     | Low                                  | Low                              | Low                         | Low   |
| Tziraki C. (2000)        | Unclear               | Low                    | Unclear                      | Low                                 | Unclear                 | High                                 | Low                              | Low                         | Low   |
| Ulbricht, S. (2014)      | Unclear               | Unclear                | Unclear                      | Low                                 | Unclear                 | High                                 | Unclear                          | Low                         | High  |
| Watson E. (2001)         | Low                   | Low                    | Unclear                      | High                                | High                    | High                                 | Low                              | Low                         | Low   |
| Watson M. (2001)         | Unclear               | Low                    | High                         | Unclear                             | High                    | Low                                  | Low                              | Low                         | Low   |
| Worrall, G. (1999)       | Low                   | Low                    | Low                          | Unclear                             | Low                     | High                                 | Low                              | Low                         | High  |
| Zwarenstein, M. (2014)   | Low                   | Low                    | Unclear                      | Low                                 | Low                     | Low                                  | Low                              | Low                         | Low   |
