# Supplementary material for: What is the effectiveness of printed educational materials on primary care physician knowledge, behaviour, and patient outcomes: a systematic review and meta-analyses
Source: Springer Nature journal article supplement (doi:10.1186/s13012-015-0347-5), 2015-12-01

## Meta-Analyses Results

### A) Patient Dichotomous Outcomes

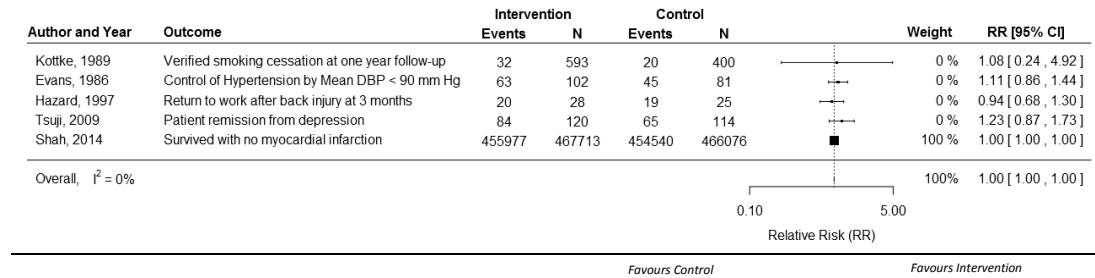

### B) Patient Dichotomous Outcomes (with Shah 2014 removed)

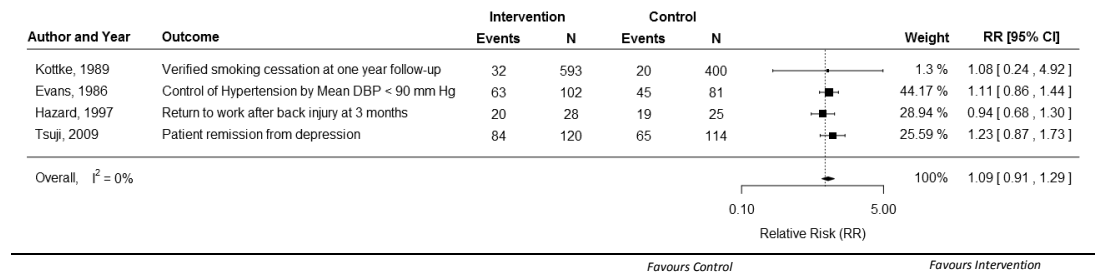

### C) Physician Behaviour Continuous Outcomes (N=physicians)

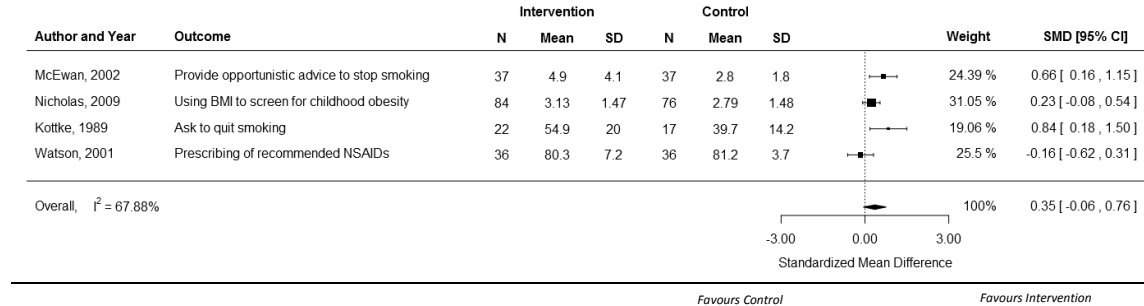

### D) Physician Behaviour Continuous Outcomes (N=patients)

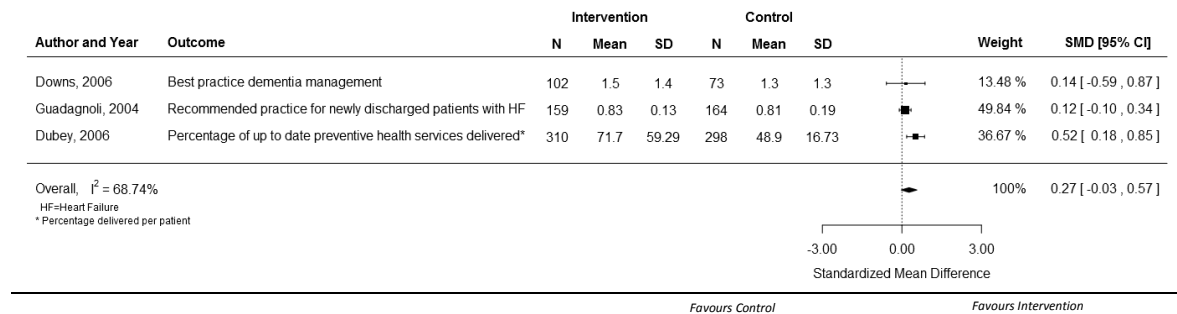

### D) Physician Behaviour Dichotomous Outcomes (N=physicians)

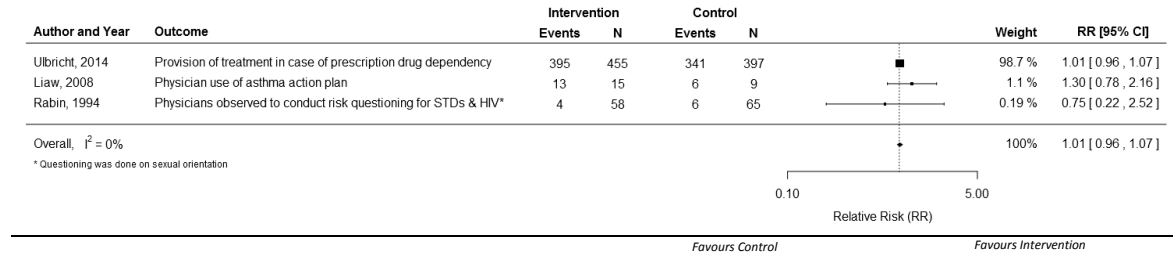

### F) Physician Behaviour Dichotomous Outcomes N=patients)

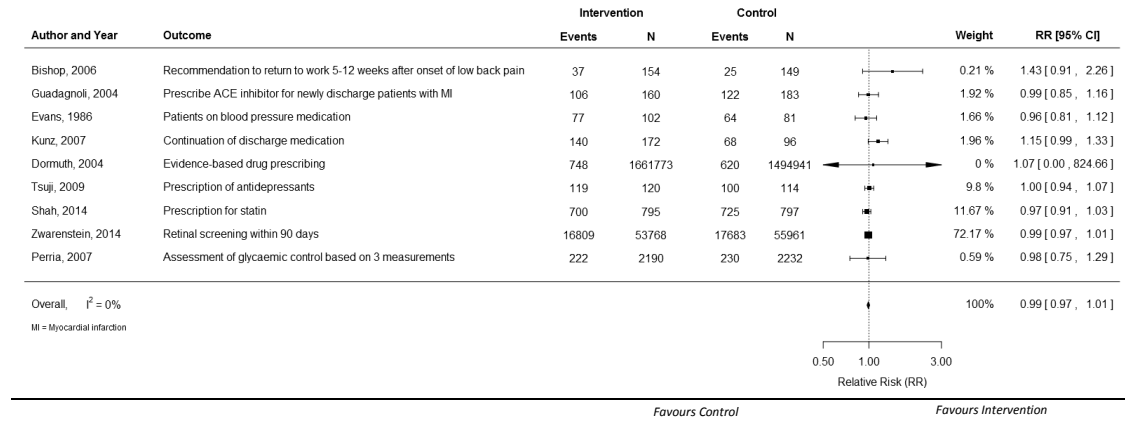

### G) Physician Behaviour Dichotomous Outcomes, PEMs vs. Workshop

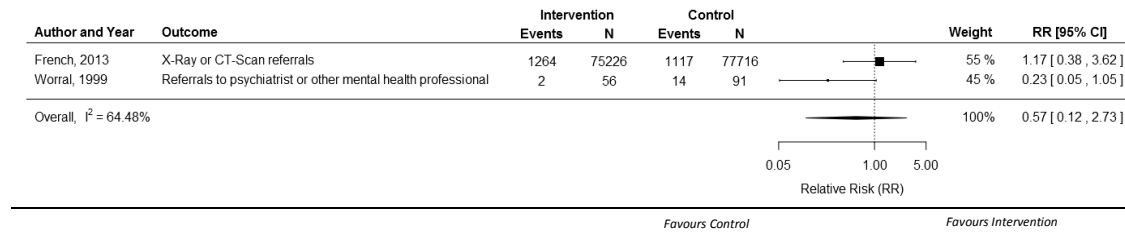

### H) Physician Cognition Continuous Outcomes

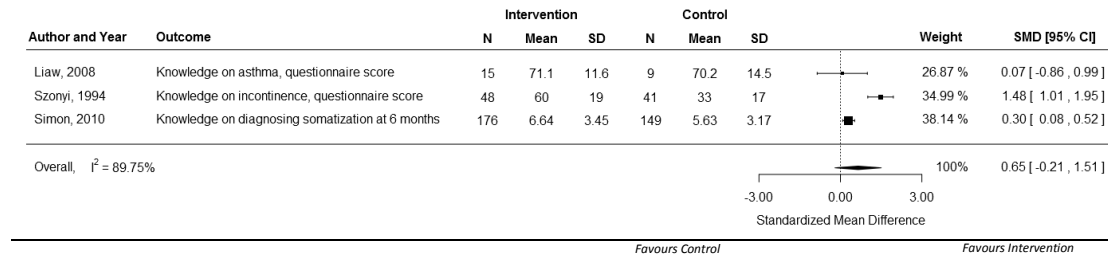

## I) Physician Cognition Dichotomous Outcomes

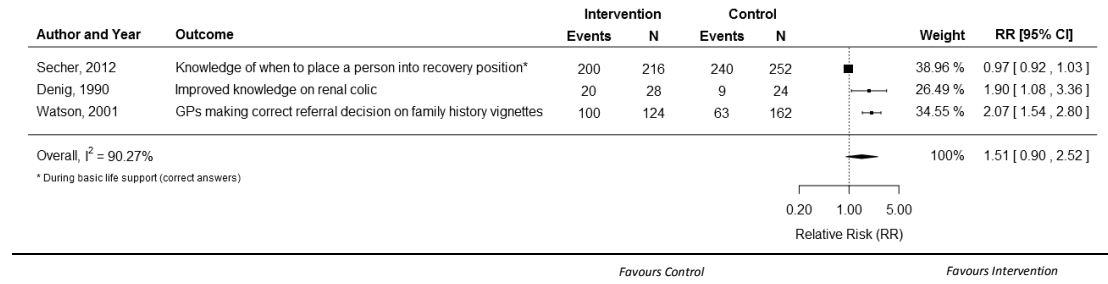

Supplement: MOESM5 [file 9773224]
