# Supplementary material for: What is the effectiveness of printed educational materials on primary care physician knowledge, behaviour, and patient outcomes: a systematic review and meta-analyses
Source: Springer Nature journal article supplement (doi:10.1186/s13012-015-0347-5), 2015-12-01
Supplement: MOESM6 [file 9773224]

**Additional file 6: Sub Analyses for Heterogeneity**

| <b>Outcome</b>                                                                              | <b>Number of Studies</b> | <b>Summary Statistic</b><br>RR=Relative Risk<br>SMD=Standard Mean<br>Difference | <b>Confidence Interval</b> | <b>I<sup>2</sup> statistic</b> |
|---------------------------------------------------------------------------------------------|--------------------------|---------------------------------------------------------------------------------|----------------------------|--------------------------------|
| Physician Behaviour Outcomes (N=physician): Sub Analysis for Similar Topic                  | 2 [25, 35]               | SMD=0.72                                                                        | 0.34-1.10                  | 0%                             |
| Physician Behaviour Outcomes (N=physician): Sub Analysis for Similar Type of Intervention   | 2 [24, 28]               | SMD=0.08                                                                        | -0.29-0.45                 | 45%                            |
| Physician Behaviour Outcomes (N=physician): Sub Analysis for Similar Length of Intervention | 2 [24, 25]               | SMD=0.46                                                                        | -0.12-1.04                 | 63%                            |
| Physician Behaviour Outcomes (N=physician): Sub Analysis for Similar Participants           | 3 [25, 28, 35]           | SMD=0.42                                                                        | -0.18-1.03                 | 75%                            |
| Physician Behaviour Outcomes (N=physician): Sub Analysis for Similar Behaviour Targeted     | 2 [25, 35]               | SMD=0.72                                                                        | 0.34-1.10                  | 0%                             |
| Physician Behaviour Outcomes (N=patient): Sub Analysis for Similar Type of Intervention     | 2 [22, 41]               | SMD=0.33                                                                        | -0.06-0.72                 | 88%                            |
| Physician Behaviour Outcomes (N=patient): Sub Analysis for Similar Risk of Bias             | 2 [33, 41]               | SMD=0.35                                                                        | -0.01-0.72                 | 78%                            |
| Physician Behaviour Outcomes (N=patient): Sub Analysis for Similar Targeted Behaviour       | 2 [22, 33]               | SMD=0.13                                                                        | -0.05-0.31                 | 0%                             |
